# Supplementary material for: The protection of luteolin against diabetic cardiomyopathy in rats is related to reversing JNK-suppressed autophagy
Source: Royal Society of Chemistry journal article supplement (doi:10.1039/d2fo03871d), 2023-01-01
Supplement: d2fo03871d2.pdf [file d2fo03871d2.pdf]

## Supplemental materials

**Table S1** Heart weight (HW)/body weight (BW) and (D) HW/tibia length (TL), collagen and the contractile function in rat hearts

|     | HW/BW<br>(mg/g) | HW/TL<br>(mg/mm) | collagen (mg/g) | LVDP<br>(mmHg) | LVEDP<br>(mmHg) |
|-----|-----------------|------------------|-----------------|----------------|-----------------|
| ND  | 2.59±0.36       | 31.7±0.4         | 3.78±0.41       | 87.4±8.6       | 5.4±0.4         |
| Lut | 2.61±0.41       | 31.2±0.5         | 3.71±0.47       | 87.2±9.3       | 5.3±0.6         |

Cardiac collagen was determined by the measurement of hydroxyproline content using a commercial kit. After the rat was anesthetized, an aortic catheter linked to the physiological signal acquisition system was introduced into the left ventricle through the right carotid artery to monitor contractile function. ND, non-diabetic control; Lut, non-diabetic control rats treated with luteolin (200 mg/kg/d, i.g.) for 4 weeks; LVDP, left ventricular developed pressure; LVEDP, left ventricular end diastolic pressure. Data are shown as the mean ± SD,  $n = 7$ .
