# Supplementary figures and images for: The protection of luteolin against diabetic cardiomyopathy in rats is related to reversing JNK-suppressed autophagy
Source: Royal Society of Chemistry journal article supplement (doi:10.1039/d2fo03871d), 2023-01-01

1: ND; 2: D; 3: Luteolin-L; 4: Luteolin-M; 5: Luteolin-H

p62 (62kD)

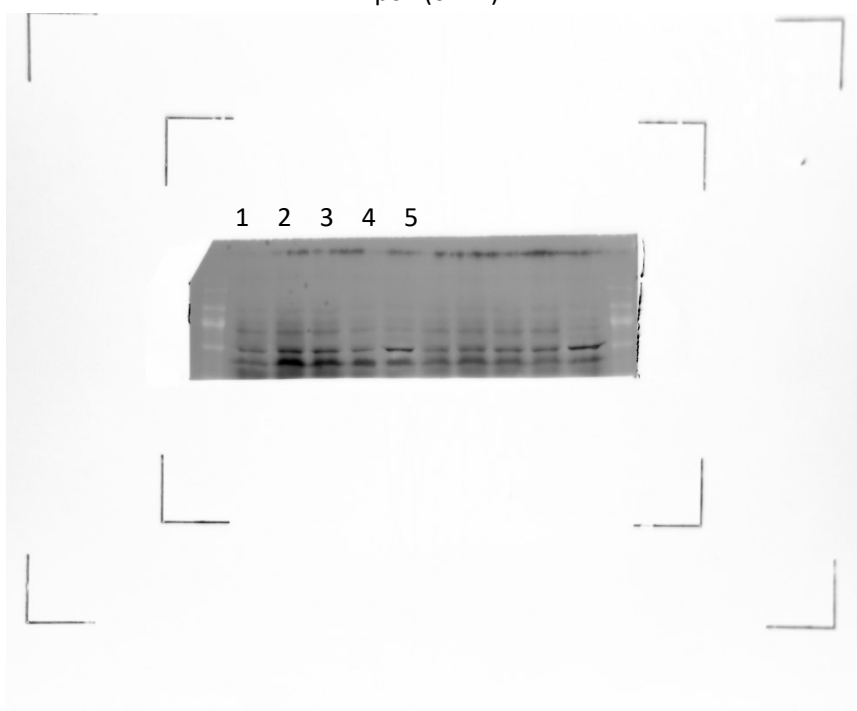

LC3 (17, 19kD)

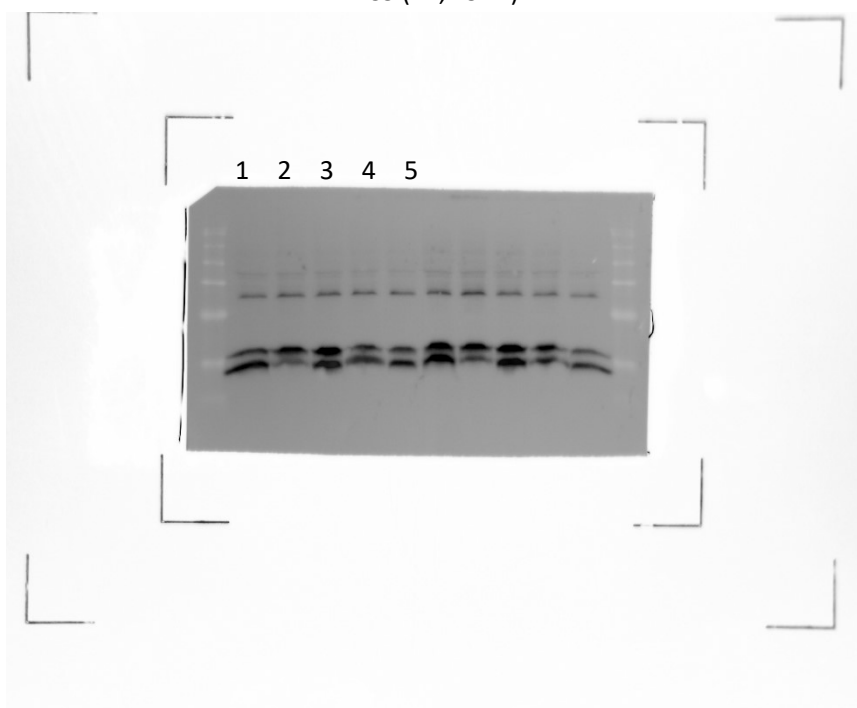

GAPDH (36 kD)

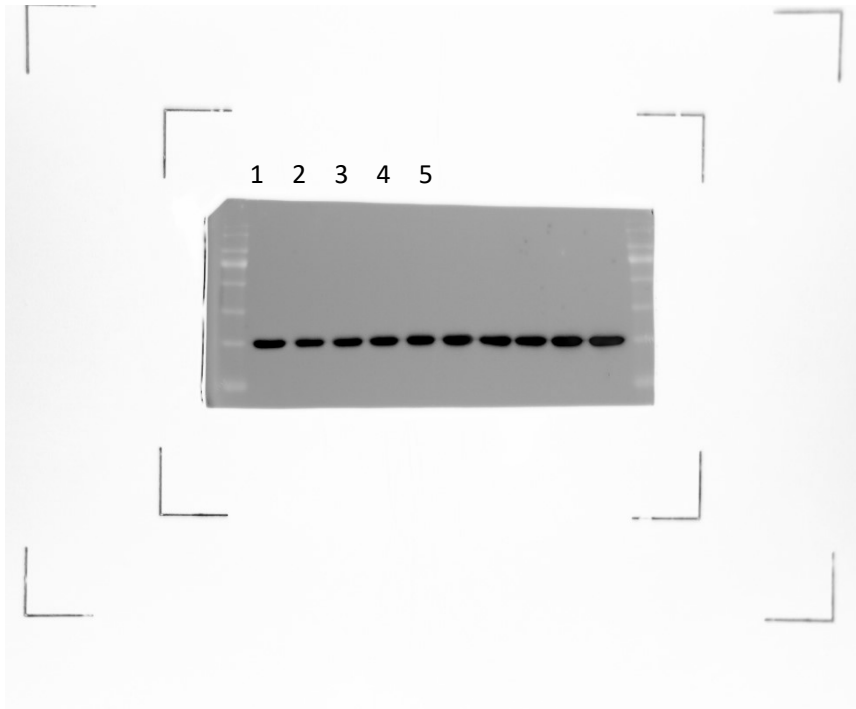

p-c-Jun (37kD)

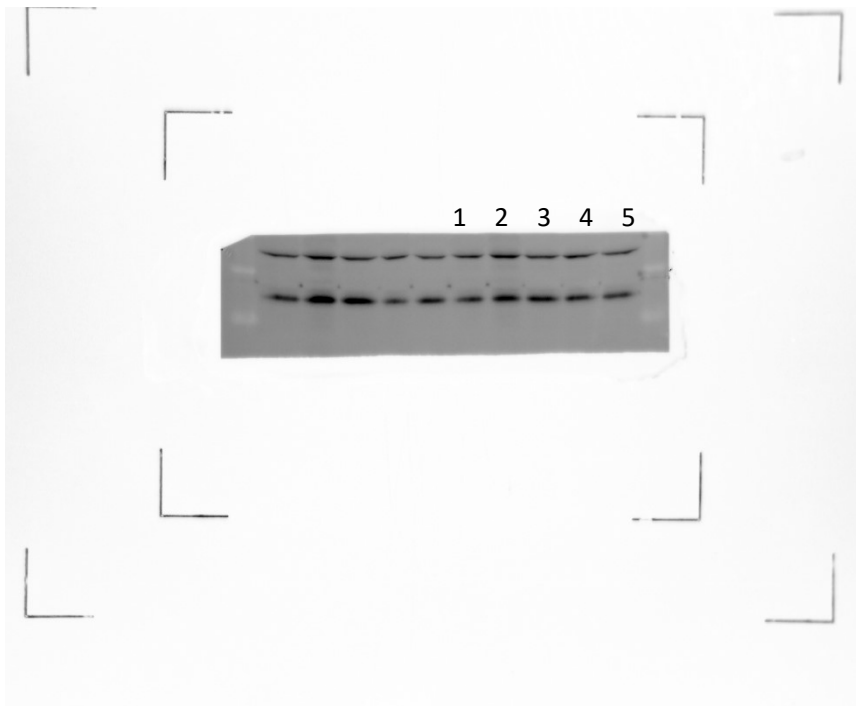

c-Jun (37kD)

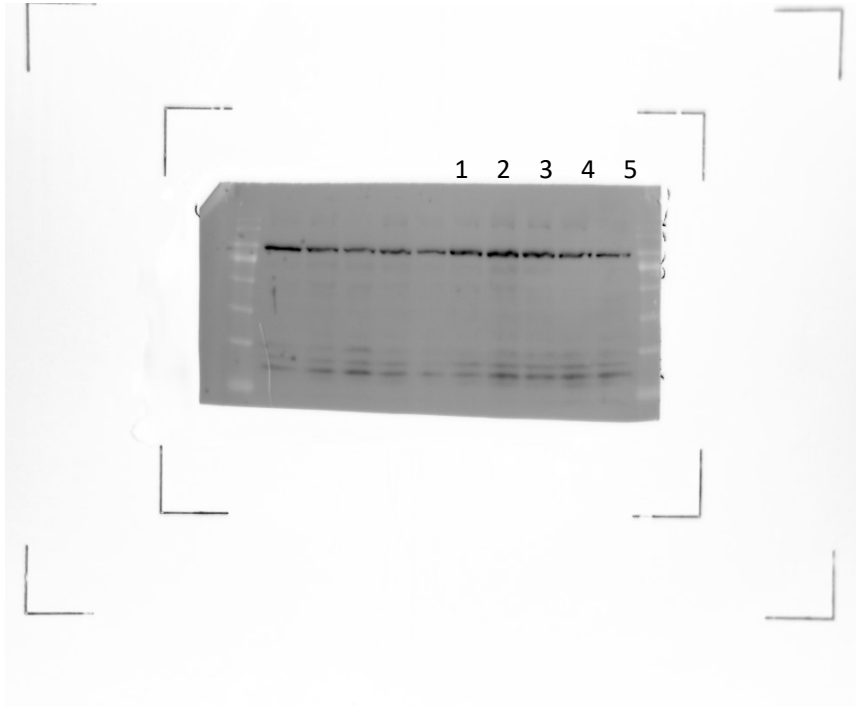

p-JNK (46, 54 kD)

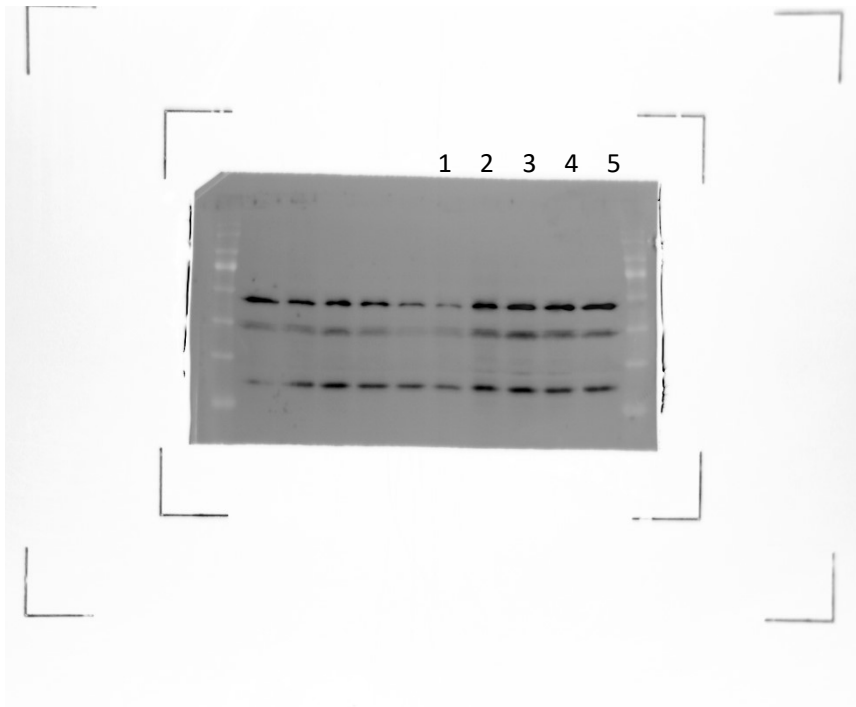

JNK (46, 54 kD)

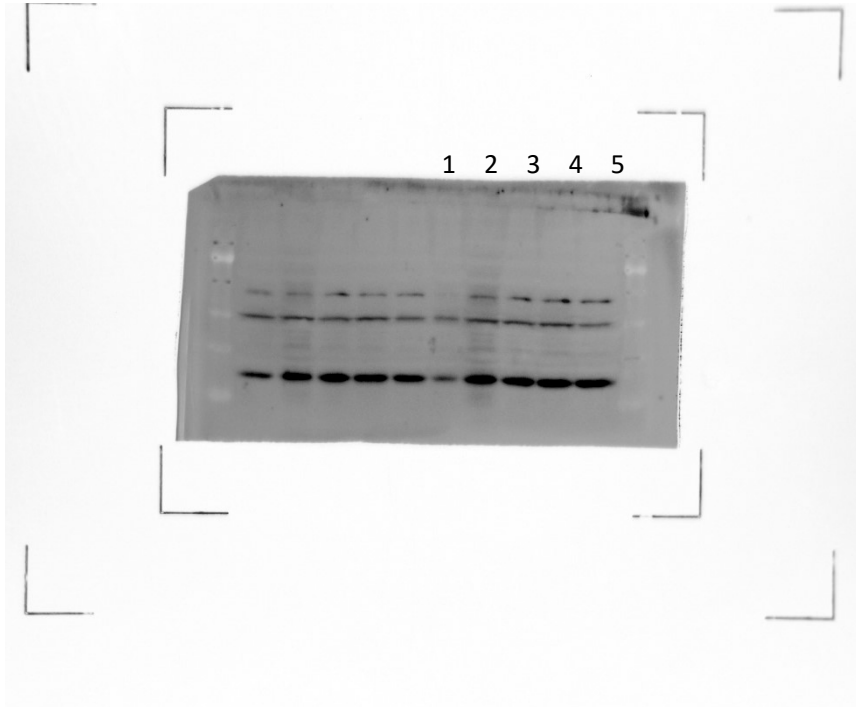

Supplement: d2fo03871d1.pdf [file d2fo03871d1.pdf]
